# Supplementary material for: High-sensitivity SERS based sensing on the labeling side of glass slides using low branched gold nanoparticles prepared with surfactant-free synthesis
Source: Royal Society of Chemistry journal article supplement (doi:10.1039/d0ra02490b), 2020-01-01
Supplement: d0ra02490b1.pdf [file d0ra02490b1.pdf]

## Supplementary material

# High-sensitivity SERS based sensing on the labeling side of glass slide using low branched gold nanoparticles prepared with surfactant-free synthesis

Tuğba Tezcan <sup>a</sup>, Chia-Hsien Hsu <sup>\*abc</sup>

a Institutes of Biomedical Engineering and Nanomedicine, National Health Research Institutes, Zhunan 35053, Taiwan; ttezcan@nhri.edu.tw

b Institute of Nano Engineering and MicroSystems, National Tsing Hua University, Hsinchu 30013, Taiwan; chsu@nhri.org.tw

c Ph.D. Program in Tissue Engineering and Regenerative Medicine, National Chung Hsing University, Taichung, Taiwan

\* Corresponding Author: chsu@nhri.org.tw; Tel.: +886-37-246-166 (ext. 37105)

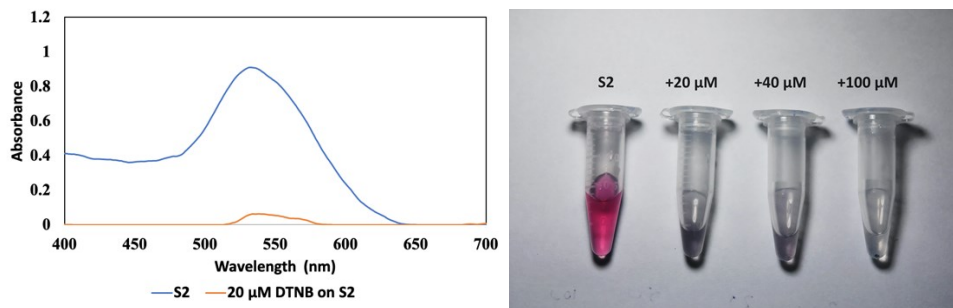

**Fig. S1** UV-vis absorbance graphs for S2 solution before and after adding 20  $\mu\text{M}$  DTNB (right). Images of S2 after adding DTNB (left).

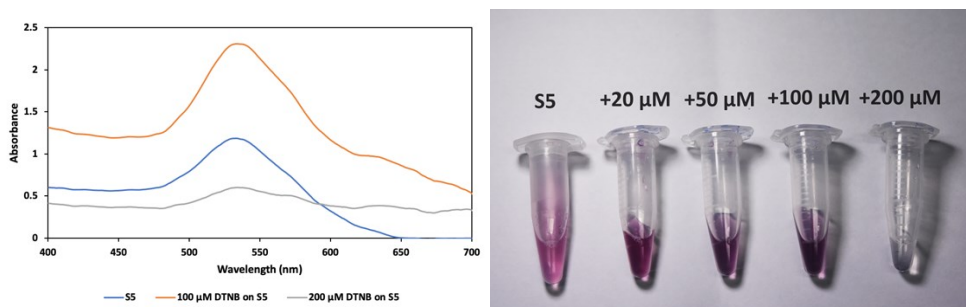

**Fig. S2** UV-vis absorbance graphs for S5 solution before and after adding 100  $\mu\text{M}$  and 200  $\mu\text{M}$  of DTNB (right). Images of S5 after adding DTNB (left).

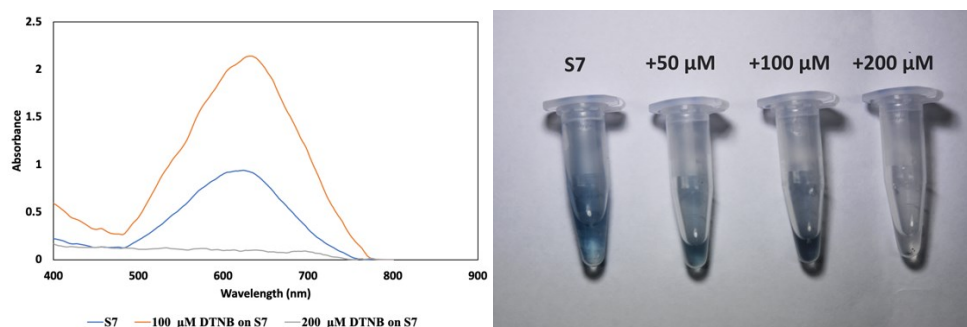

**Fig. S3** UV-vis absorbance graphs for S7 solution before and after adding 100  $\mu\text{M}$  and 200  $\mu\text{M}$  of DTNB. Images of S7 after adding DTNB (left).

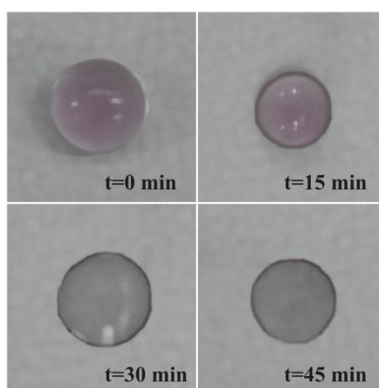

**Fig. S4** Top view of droplet on white epoxy ink side of glass slide during evaporation process.

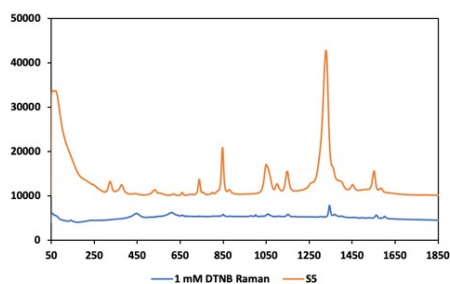

**Fig. S5** SERS spectra of 100  $\mu\text{M}$  DTNB on S5 sample and Raman spectra of 1 mM DTNB in 0.1 M PBS for reference.

**Table S1**

The calculated RSD for SERS intensity of 100  $\mu\text{M}$  of DTNB modified samples ( from S1 to S8) obtained from 15 random sites on the epoxy part of slide at the strongest peak ( $1337\text{ cm}^{-1}$ ).

| Sample Nu. | RSD    |
|------------|--------|
| S1         | 28.5 % |
| S2         | 34.5 % |
| S3         | 19.9 % |
| S4         | 11.5 % |
| S5         | 1.7 %  |
| S6         | 8.9 %  |
| S7         | 7.7 %  |
| S8         | 5.3 %  |

**Table S2**

The calculated RSD for SERS intensity of 100  $\mu\text{M}$  of DTNB modified samples ( from S1 to S8) obtained from 15 random sites on the epoxy part of slide at the strongest peak ( $1556\text{ cm}^{-1}$ ).

| Sample Nu. | RSD    |
|------------|--------|
| S1         | 21.5 % |
| S2         | 35.5 % |
| S3         | 17.3 % |
| S4         | 12.3 % |
| S5         | 1.9 %  |
| S6         | 6.7 %  |
| S7         | 7.6 %  |
| S8         | 6.4 %  |
